# Supplementary material for: Sensory pain characteristics of vulvodynia and their association with nociceptive and neuropathic pain: an online survey pilot study
Source: PubMed Central journal article supplement (PMC6455692; doi:10.1097/pr9.0000000000000713), 2019-02-22
Supplement: painreports-4-e713-s001.pdf [file painreports-4-e713-s001.pdf]

**Table Supplemental Digital Content 1.**

**Frequency of All Pain Quality Descriptors Selected by the Total Sample of Women with Generalized Vulvodynia and Provoked Vestibulodynia (n = 60)**

| <b>Neuropathic<br/>(n = 28 words)</b> |          | <b>Nociceptive<br/>(n = 26 words)</b> |          | <b>Other<br/>(n = 24 words)</b> |          |
|---------------------------------------|----------|---------------------------------------|----------|---------------------------------|----------|
| Burning                               | 52 (87%) | Heavy                                 | 36 (60%) | Punishing                       | 45 (75%) |
| Itchy                                 | 43 (72%) | Pressing                              | 36 (60%) | Cruel                           | 38 (63%) |
| Hot                                   | 41 (68%) | Crushing                              | 34 (57%) | Annoying                        | 38 (63%) |
| Stabbing                              | 41 (68%) | Sharp                                 | 34 (57%) | Dreadful                        | 37 (62%) |
| Aching                                | 39 (65%) | Hurting                               | 33 (55%) | Killing                         | 36 (60%) |
| Tight                                 | 35 (58%) | Squeezing                             | 31 (52%) | Terrifying                      | 29 (48%) |
| Stinging                              | 34 (57%) | Tearing                               | 28 (47%) | Vicious                         | 29 (48%) |
| Tingling                              | 30 (50%) | Lacerating                            | 22 (37%) | Troublesome                     | 27 (45%) |
| Boring                                | 28 (47%) | Cramping                              | 20 (33%) | Torturing                       | 27 (45%) |
| Pricking                              | 25 (42%) | Piercing                              | 20 (33%) | Unbearable                      | 26 (43%) |
| Lancinating                           | 23 (38%) | Cutting                               | 19 (32%) | Miserable                       | 22 (36%) |
| Searing                               | 22 (37%) | Pinching                              | 18 (30%) | Sickening                       | 20 (33%) |
| Cold                                  | 16 (27%) | Pounding                              | 18 (30%) | Frightening                     | 18 (30%) |
| Cool                                  | 12 (20%) | Beating                               | 13 (22%) | Grueling                        | 12 (20%) |
| Freezing                              | 7 (12%)  | Pulsing                               | 11 (18%) | Fearful                         | 9 (15%)  |
| Scalding                              | 6 (10%)  | Splitting                             | 11 (18%) | Agonizing                       | 9 (15%)  |
| Penetrating                           | 4 (7%)   | Tender                                | 11 (18%) | Tiring                          | 8 (13%)  |
| Shooting                              | 4 (7%)   | Dull                                  | 10 (17%) | Suffocating                     | 8 (13%)  |
| Flickering                            | 3 (5%)   | Sore                                  | 10 (17%) | Exhausting                      | 7 (11%)  |
| Drilling                              | 2 (3%)   | Gnawing                               | 8 (13%)  | Intense                         | 7 (11%)  |
| Quivering                             | 2 (3%)   | Throbbing                             | 8 (13%)  | Blinding                        | 6 (10%)  |
| Radiating                             | 2 (3%)   | Wrenching                             | 4 (7%)   | Nagging                         | 3 (5%)   |
| Smarting                              | 2 (3%)   | Pulling                               | 3 (5%)   | Nauseating                      | 2 (3%)   |
| Spreading                             | 2 (3%)   | Tugging                               | 3 (5%)   | Wretched                        | 1 (2%)   |
| Drawing                               | 1 (2%)   | Rasping                               | 1 (2%)   |                                 |          |
| Flashing                              | 1 (2%)   | Taut                                  | 1 (2%)   |                                 |          |
| Jumping                               | 1 (2%)   |                                       |          |                                 |          |
| Numb                                  | 1 (2%)   |                                       |          |                                 |          |
